# Supplementary material for: Live-cell quantitative monitoring reveals distinct, high-affinity Gβγ regulations of GIRK2 and GIRK1/2 channels
Source: Springer Nature journal article supplement (doi:10.1038/s41467-025-66730-8), 2025-11-24
Supplement: MOESM2 [file 41467_2025_66730_MOESM2_ESM.pdf › 41467_2025_66730_MOESM2_ESM.pdf]

**Title:** Supplementary Data 1

**Description:** MD simulation analysis details. This Table provides the details of analysis of MD simulations of the interaction of Gy' prenylated tail (Gy<sub>prenyl</sub>) with G1NC, G1NC<sub>trunc</sub>, G2NC and G2NC<sub>trunc</sub>, and of G1NT-G1dCT interactions. It contains 6 sub-tables:

Sub-Table 1: G1NC - Prenylation Tail and NT-dCT binding

Table 2: Truncated G1NC - Prenylation Tail binding

Sub-Table 3: G2NC - Prenylation Tail binding

Sub-Table 4: Truncated G2NC - Prenylation Tail binding

Sub-Table 5: G1NC with Membrane - Prenylation Tail binding

Sub-Table 6: G1NC - all-atom simulations - Prenylation Tail binding

**Title:** Supplementary Data 2

**Description:** Primers using for DNA cloning. Oligonucleotides used as primers in the creation of DNA constructs and mutations described in the paper.
