# Supplementary material for: Live-cell quantitative monitoring reveals distinct, high-affinity Gβγ regulations of GIRK2 and GIRK1/2 channels
Source: Nat Commun. 2025 Nov 24;16:11607. doi: 10.1038/s41467-025-66730-8 (PMC12748987; doi:10.1038/s41467-025-66730-8)
Supplement: Supplementary file 3 — Supplementary Data 1 [file 41467_2025_66730_MOESM3_ESM.xlsx]

## Sheet: 5µs_extended
	Supplementary Table 14. MD simulation analysis details
List of sub-tables with links			Note: "Prenylation Tail" stands for Gγprenyl
Table					Location
Sub-Table 1: G1NC - Prenylation Tai and NT-dCT binding					A13
Table 2: Truncated G1NC - Prenylation Tail binding					A52
Sub-Table 3: G2NC - Prenylation Tail binding					A91
Sub-Table 4: Truncated G2NC - Prenylation Tail binding					A161
Sub-Table 5: G1NC with Membrane - Prenylation Tail binding					A230
Sub-Table 6: G1NC - all-atom simulations - Prenylation Tail binding					A263
Sub-Sub-Table 1: G1NC - Prenylation Tail and NT-dCT binding
Run	Simulation time	G1NC – Prenylation tail binding [Percentage of frames with min. 1 bound prenylation tail]	G1NC – Prenylation tail binding [Average of each subunit]	Gβγ – Prenylation tail (last atom) binding	Gβγ – Prenylation tail binding	G1NC - NT-dCT Interactions	G1NC - NT-dCT Interactions		Mann-Whitney U for G1NC - Prenyl binding
				[Percentage of frames with min. 1 bound prenylation tail]	[average percentages for each subunit]	[Percentage of frames with min. 1 interaction NT-dCT]	[average percentages for each subunit]		p	0.0079 (**)
Run 1	5 µs	1	0.9989	0.9358	0.4765	0.9979	0.6358		U	0.0025
Run 2	5 µs	1	0.9985	0.9993	0.7694	0.9986	0.7055
Run 3	5 µs	1	0.9944	0.9828	0.5483	0.9951	0.5471
Run 4	5 µs	1	0.9997	0.9085	0.4109	0.9724	0.5451
Run 5	5 µs	1	1	0.4189	0.1305	0.9829	0.5487
Mean ± SEM		100% ± 0%	99.83% ± 0.1%	84.91% ± 10.88%	46.71% ± 10.36%	98.94% ± 0.51%	59.64% ± 3.22%
Run	Simulation Time	Chain	G1NC - Tail binding	Gβγ - Tail binding	NT - dCT Interactions
Run 1	5 µs	Chain A	0.9991	0.3634	0.6277
		Chain B	0.9998	0.3195	0.9195
		Chain C	0.9999	0.7611	0.027
		Chain D	0.9968	0.4618	0.969
		Mean ± SEM	99.89% ± 0.07%	47.65% ± 9.94%	63.58% ± 21.65%
Run 2	5 µs	Chain A	0.9993	0.5468	0.6044
		Chain B	0.9998	0.9248	0.9864
		Chain C	0.9999	0.8808	0.8209
		Chain D	0.9948	0.7251	0.4102
		Mean ± SEM	99,84% ± 0,12%	76,94% ± 8,57%	70,55% ± 12,57%
Run 3	5 µs	Chain A	0.9993	0.2115	0.0656
		Chain B	0.9974	0.8675	0.953
		Chain C	0.9979	0.5022	0.6593
		Chain D	0.9829	0.6121	0.5104
		Mean ± SEM	99,44% ± 0,38%	54,83% ± 13,59%	54,71% ± 18,5%
Run 4	5 µs	Chain A	0.9999	0.6239	0.7689
		Chain B	0.9987	0.4916	0.7489
		Chain C	1	0.0301	0.3657
		Chain D	1	0.4978	0.2969
		Mean ± SEM	99,96% ± 0,03%	41,08% ± 13,05%	54,51% ± 12,43%
Run 5	5 µs	Chain A	0.9999	0.0431	0.7824
		Chain B	1	0.1184	0.2797
		Chain C	1	0.2877	0.8148
		Chain D	1	0.0729	0.318
		Mean ± SEM	100% ± 0%	13,05% ± 5,46%	54,87% ± 14,46%
Sub-Table 2: Truncated G1NC - Prenylation Tail binding
Run	Simulation time	Trunc. G1NC – Prenylation tail binding [Percentage of frames with min. 1 bound prenylation tail]	Trunc. G1NC – Prenylation tail binding [Average of each subunit]	Gβγ – Prenylation tail (last atom) binding	Gβγ – Prenylation tail binding
				[Percentage of frames with min. 1 bound prenylation tail]	[average percentages for each subunit]
Run 1	5 µs	0.0009	0.0002	1	0.9201
Run 2	5 µs	0.0029	0.0009	0.9999	0.8987
Run 3	5 µs	0.0035	0.0009	1	0.9296
Run 4	5 µs	0.0005	0.0001	1	0.9599
Run 5	5 µs	0.0001	0	1	0.9335
Mean ± SEM		0.16% ± 0.07%	0.04% ± 0.02%	100% ± 0%	92.84% ± 0.99%
Run	Simulation Time	Chain	Trunc. G1NC - Tail binding	Gβγ - Tail binding
Run 1	5 µs	Chain A	0	0.9401
		Chain B	0	0.9794
		Chain C	0.0008	0.8809
		Chain D	0	0.8798
		Mean ± SEM	0,02% ± 0,02%	92,01% ± 2,43%
Run 2	5 µs	Chain A	0	0.8537
		Chain B	0	0.962
		Chain C	0.0027	0.8767
		Chain D	0.001	0.9022
		Mean ± SEM	0,09% ± 0,06%	89,86% ± 2,33%
Run 3	5 µs	Chain A	0.0027	0.9432
		Chain B	0.0008	0.8988
		Chain C	0	0.9104
		Chain D	0	0.9659
		Mean ± SEM	0,09% ± 0,06%	92,96% ± 1,53%
Run 4	5 µs	Chain A	0	0.9554
		Chain B	0.0002	0.9718
		Chain C	0.0002	0.9359
		Chain D	0.0001	0.9765
		Mean ± SEM	0,01% ± 0%	95,99% ± 0,92%
Run 5	5 µs	Chain A	0	0.9619
		Chain B	0	0.9482
		Chain C	0.0001	0.9555
		Chain D	0	0.8684
		Mean ± SEM	0% ± 0%	93,35% ± 2,19%
Sub-Table 3: G2NC - Prenylation Tail binding
Run	Simulation time	G2NC – Prenylation tail binding [Percentage of frames with min. 1 bound prenylation tail]	G2NC – Prenylation tail binding [Average of each subunit]	Gβγ – Prenylation tail (last atom) binding
				[Percentage of frames with min. 1 bound prenylation tail]
Run 1	5 µs	0.0748	0.0178	1
Run 2	5 µs	0.066	0.0167	0.9996
Run 3	5 µs	0.0815	0.0205	1
Run 4	5 µs	0.0001	0	0.9999
Run 5	5 µs	0.0155	0.0039	1
Run 6	5 µs	0.133	0.0333	0.9999
Run 7	5 µs	0.0466	0.0169	0.9999
Run 8	5 µs	0.1238	0.0312	1
Run 9	5 µs	0.0551	0.0218	0.9997
Run 10	5 µs	0.0417	0.0136	0.9997
Mean ± SEM		6,38% ± 1,34%	1,76% ± 0,33%	99,99% ± 0%
Run	Simulation Time	Chain	G2NC - Tail binding	Gβγ - Tail binding
Run 1	5 µs	Chain A	0	0.825
		Chain B	0	0.9595
		Chain C	0.0747	0.9341
		Chain D	0.0002	0.9172
		Mean ± SEM	1,87% ± 1,87%	90,9% ± 2,93%
Run 2	5 µs	Chain A	0	0.8113
		Chain B	0.0127	0.8616
		Chain C	0.001	0.8554
		Chain D	0.053	0.9617
		Mean ± SEM	1,67% ± 1,24%	87,25% ± 3,18%
Run 3	5 µs	Chain A	0	0.9132
		Chain B	0.081	0.8369
		Chain C	0.0006	0.943
		Chain D	0.0002	0.8488
		Mean ± SEM	2,05% ± 2,02%	88,55% ± 2,55%
Run 4	5 µs	Chain A	0	0.9874
		Chain B	0.0001	0.8911
		Chain C	0	0.9481
		Chain D	0	0.9786
		Mean ± SEM	0% ± 0%	95,13% ± 2,18%
Run 5	5 µs	Chain A	0.0002	0.9131
		Chain B	0.0001	0.8221
		Chain C	0.0004	0.9249
		Chain D	0.0149	0.9555
		Mean ± SEM	0,39% ± 0,37%	90,39% ± 2,87%
Run 6	5 µs	Chain A	0.0004	0.9137
		Chain B	0.0005	0.9285
		Chain C	0.0001	0.9282
		Chain D	0.1321	0.936
		Mean ± SEM	3,33% ± 3,29%	92,66% ± 0,47%
Run 7	5 µs	Chain A	0.0021	0.9378
		Chain B	0.0002	0.9585
		Chain C	0.0239	0.7578
		Chain D	0.0414	0.9146
		Mean ± SEM	1,69% ± 0,98%	89,22% ± 4,57%
Run 8	5 µs	Chain A	0.0001	0.9372
		Chain B	0.0022	0.8215
		Chain C	0.1216	0.9375
		Chain D	0.0009	0.8705
		Mean ± SEM	3,12% ± 3,01%	89,17% ± 2,82%
Run 9	5 µs	Chain A	0.0001	0.9359
		Chain B	0.0003	0.9112
		Chain C	0.049	0.9436
		Chain D	0.0377	0.8303
		Mean ± SEM	2,18% ± 1,27%	90,52% ± 2,59%
Run 10	5 µs	Chain A	0.0025	0.8488
		Chain B	0.0001	0.9224
		Chain C	0.0367	0.9344
		Chain D	0.015	0.7948
		Mean ± SEM	1,36% ± 0,84%	87,51% ± 3,28%
Sub-Table 4: Truncated G2NC - Prenylation Tail binding
Run	Simulation time	Trunc. G2NC – Prenylation tail binding [Percentage of frames with min. 1 bound prenylation tail]	Trunc. G2NC – Prenylation tail binding [Average of each subunit]	Gβγ – Prenylation tail (last atom) binding	Gβγ – Prenylation tail binding								Gβγ – Prenylation tail binding		Mann-Whitney U for G2NC
				[Percentage of frames with min. 1 bound prenylation tail]	[average percentages for each subunit]								[average percentages for each subunit]		p	0.775 (ns)
Run 1	5 µs	0.0472	0.012	1	0.9062								0.909		U	49
Run 2	5 µs	0.0002	0.0001	1	0.9792								0.8725
Run 3	5 µs	0.1326	0.0332	1	0.7885								0.8855
Run 4	5 µs	0.0015	0.0004	0.9999	0.7964								0.9513
Run 5	5 µs	0.0025	0.0006	0.9999	0.8919								0.9039
Run 6	5 µs	0.1072	0.0283	1	0.916								0.9266
Run 7	5 µs	0.0515	0.0129	0.9998	0.86								0.8922
Run 8	5 µs	0.0012	0.0003	0.999	0.7855								0.8917
Run 9	5 µs	0.1833	0.0459	1	0.8467								0.9053
Run 10	5 µs	0.0009	0.0002	1	0.8323								0.8751
Mean ± SEM		5,28% ± 2,1%	1,34% ± 0,53%	99,99% ± 0,01%	86,03% ± 2%								90,13% ± 0,76%
Run	Simulation Time	Chain	Trunc. G2NC - Tail binding	Gβγ - Tail binding
Run 1	5 µs	Chain A	0.0316	0.8074
		Chain B	0	0.8776
		Chain C	0.0004	0.9902
		Chain D	0.0159	0.9495
		Mean ± SEM	1,2% ± 0,75%	90,62% ± 4,03%
Run 2	5 µs	Chain A	0	0.9589
		Chain B	0.0001	0.9507
		Chain C	0.0001	0.9894
		Chain D	0.0001	0.9924
		Mean ± SEM	0,01% ± 0%	97,28% ± 1,06%
Run 3	5 µs	Chain A	0.1322	0.8291
		Chain B	0.0003	0.4318
		Chain C	0	0.9922
		Chain D	0.0001	0.9009
		Mean ± SEM	3,32% ± 3,3%	78,85% ± 12,35%
Run 4	5 µs	Chain A	0.0002	0.9594
		Chain B	0.0006	0.9162
		Chain C	0.0007	0.9598
		Chain D	0.0001	0.3428
		Mean ± SEM	0,04% ± 0,01%	79,46% ± 15,09%
Run 5	5 µs	Chain A	0.0009	0.8584
		Chain B	0.0016	0.9124
		Chain C	0	0.864
		Chain D	0	0.9328
		Mean ± SEM	0,06% ± 0,04%	89,19% ± 1,82%
Run 6	5 µs	Chain A	0.0714	0.8892
		Chain B	0.0001	0.9944
		Chain C	0.0321	0.952
		Chain D	0.0094	0.8282
		Mean ± SEM	2,82% ± 1,59%	91,6% ± 3,64%
Run 7	5 µs	Chain A	0.0508	0.776
		Chain B	0	0.888
		Chain C	0.0001	0.9302
		Chain D	0.0007	0.8457
		Mean ± SEM	1,29% ± 1,26%	86% ± 3,29%
Run 8	5 µs	Chain A	0.0007	0.6777
		Chain B	0.0005	0.6819
		Chain C	0	0.834
		Chain D	0	0.9483
		Mean ± SEM	0,03% ± 0,02%	78,55% ± 6,53%
Run 9	5 µs	Chain A	0	0.8917
		Chain B	0.1827	0.9091
		Chain C	0.0007	0.8427
		Chain D	0.0002	0.7431
		Mean ± SEM	4,59% ± 4,56%	84,66% ± 3,73%
Run 10	5 µs	Chain A	0.0001	0.994
		Chain B	0	0.8462
		Chain C	0.0001	0.8162
		Chain D	0.0007	0.673
		Mean ± SEM	0,02% ± 0,02%	83,23% ± 6,58%
Sub-Table 5: G1NC with Membrane - Prenylation Tail binding
Run	Simulation time	G1NC – Prenylation tail binding [Percentage of frames with min. 1 bound prenylation tail]	G1NC – Prenylation tail binding [Average of each subunit]	Gβγ – Prenylation tail (last atom) binding	Gβγ – Prenylation tail binding	Prenylation tail - Membrane binding	Prenylation tail - Membrane binding	Prenylation tail - Membrane binding (start 2 µs)
				[Percentage of frames with min. 1 bound prenylation tail]	[average percentages for each subunit]	[Percentage of frames with min. 1 bound prenylation tail]	[average percentages for each subunit]	[Percentage of frames with min. 1 bound prenylation tail]
Run 1	5 µs	1	0.683	0.9953	0.4188	0.6329	0.1055	1
Run 2	5 µs	1	0.6666	0.9931	0.3752	0.0005	0.0001	0.0009
Run 3	5 µs	1	0.6677	0.9991	0.5919	0.0001	0	0.0001
Mean ± SEM		100% ± 0%	67,24% ± 0,53%	99,58% ± 0,18%	46,2% ± 6,62%	21,12% ± 21,09%	3,52% ± 3,52%	33,37% ± 33,32%
Run	Simulation Time	Chain	G1NC - Tail binding	Gβγ - Tail binding	Prenylation tail - Membrane
Run 1	5 µs	Chain A	1	0.1808	0
		Chain B	1	0.8541	0
		Chain C	1	0.6158	0
		Chain D	1	0.0246	0
		Chain E	0	0.3339	0.6329
		Chain F	0.0979	0.9656	0.0001
		Mean ± SEM	68,3% ± 20,09%	49,58% ± 15,39%	10,55% ± 10,55%
Run 2	5 µs	Chain A	0.9996	0.461	0.0005
		Chain B	1	0	0
		Chain C	1	0.0006	0
		Chain D	1	0.0002	0
		Chain E	0	0.8543	0
		Chain F	0	0.9348	0
		Mean ± SEM	66,66% ± 21,08%	37,52% ± 18%	0,01% ± 0,01%
Run 3	5 µs	Chain A	1	0.5624	0
		Chain B	0.9999	0.2458	0
		Chain C	0.9947	0.7191	0.0001
		Chain D	0.9866	0.1286	0
		Chain E	0.0224	0.9636	0
		Chain F	0	0.9319	0
		Mean ± SEM	66,73% ± 20,75%	59,19% ± 14,2%	0% ± 0%
Sub-Table 6: G1NC - all-atom simulations - Prenylation Tail binding
Run	Simulation time	G1NC – Prenylation tail binding [Percentage of frames with min. 1 bound prenylation tail]	G1NC – Prenylation tail binding [Average of each subunit]	Gβγ – Prenylation tail (last atom) binding	Gβγ – Prenylation tail binding	NT-dCT Interactions	NT-dCT Interactions
				[Percentage of frames with min. 1 bound prenylation tail]	[average percentages for each subunit]	[Percentage of frames with min. 1 interaction NT-dCT]	[Percentage of frames with min. 1 bound prenylation tail]
Run 1	500 ns	1	0.999	0.9526	0.6668	0.9899	0.5288
Run 2	450 ns	1	0.9914	0.9409	0.4232	1	0.7157
Run 3	500 ns	1	0.9861	0.9189	0.441	0.9702	0.5168
Mean ± SEM		100% ± 0%	99,22% ± 0,37%	93,75% ± 0,99%	51,03% ± 7,84%	98,67% ± 0,88%	58,71% ± 6,44%
Run	Simulation Time	Chain	G1NC-AA - Tail binding	Gβγ - Tail binding	NT-dCT Interactions
Run 1	500 ns	Chain A	1	0.6483	0.9834
		Chain B	1	0.6343	0.5166
		Chain C	1	0.5132	0.3851
		Chain D	0.9961	0.8715	0.2301
		Mean ± SEM	99,9% ± 0,1%	66,68% ± 7,47%	52,88% ± 16,25%
Run 2	500 ns	Chain A	0.9798	0.7249	0.9981
		Chain B	1	0.2055	0.1414
		Chain C	0.9995	0.616	0.9398
		Chain D	0.9863	0.1462	0.7388
		Mean ± SEM	99,14% ± 0,5%	42,32% ± 14,5%	70,45% ± 19,58%
Run 3	500 ns	Chain A	1	0.6288	0.8442
		Chain B	1	0.1665	0.6666
		Chain C	0.9979	0.8119	0.1183
		Chain D	0.9464	0.1569	0.4382
		Mean ± SEM	98,61% ± 1,32%	44,1% ± 16,56%	51,68% ± 15,67%
