# Supplementary material for: Live-cell quantitative monitoring reveals distinct, high-affinity Gβγ regulations of GIRK2 and GIRK1/2 channels
Source: Nat Commun. 2025 Nov 24;16:11607. doi: 10.1038/s41467-025-66730-8 (PMC12748987; doi:10.1038/s41467-025-66730-8)
Supplement: Supplementary file 4 — Supplementary Data 2 [file 41467_2025_66730_MOESM4_ESM.xlsx]

## Sheet: Sheet1
SpV-Gβ
Forward primers:
TCCGAATTCTCTAGAATGGACAAGCAGAAG
CAAGATCTGGAACTAAAAGCTTGATCTGGTT
Reverse primers:
CTTCTGCTTGTCCATTCTAGAGAATTCGGA
AACCAGATCAAGCTTTTAGTTCCAGATCTTG
SpV-Gγ
Forward primers:
TCCGAATTCTCTAGAATGGTGAGCAAGGGC
CTGTGCTATCCTTTAAAAGCTTGATCTGGTT
Reverse primers:
GCCCTTGCTCACCATTCTAGAGAATTCGGA
AACCAGATCAAGCTTTTAAAGGATAGCACAG
G1NdCT:
Forward primers:
GACCGCTTCACATAGCACCGCGATCTGGTTAC
GCTAGCCAGTCTACGGAAAGACACAATTCTGTGGAG
Reverse primers:
GTAACCAGATCGCGGTGCTATGTGAAGCGGTCAG
CAGAATTGTGTCTTTCCGTAGACTGGCTAGCC
G1N(1-40)dCT
Forward primers:
CAGTCTACGGCTAGCCAGTCTACGGAAAGAC
CCCCTCCGTATTATGTCTGCACTCCGAAGGA
Reverse primers:
CCTTCGGAGTGCAGACATAATACGGAGGGG
AGCCGTAGACTGCTTGGGTACAAGCTGCTGC
G1N(40-84)dCT
Forward primers:
CAGTCTACGGCTAGCCAGTCTACGGAAAGAC
CCCCTCCGTATTATGAAGAAGAAACGGCAGCG
Reverse primers:
CGTTTCTTCTTCATAATACGGAGGGGAGATC
CAAGTGGCGTTGGAACCTCCAGTCTACGGCT
Sumo-G1NT
Forward primers:
GATATCCCAACGACCTCTGCACTCCGAAGGAA
GATCCGAATTCATGGGCAACGATCACATTAAC
Reverse primers:
GTGATCGTTGCCCATGAATTCGGATCCCCGGG
TCGGAGTGCAGAGGTCGTTGGGATATCATC
Sumo-G1dCT
Forward primers:
TCCCAACGACCGAAAGACACAATTCTGTGGAG
CCCTCCGTATTATGGGCAACGATCACATTAAC
Reverse primers:
TGGATCTCCCCTCCGTATTATGGGCAACGATC
GATGATATCCCAACGACCGAAAGACACAATT
YFP-Gγ(C68S)
Fwd: GAAGAAGTTTTTCAGTGCTATCCTTTAAG
Rev: CTTAAAGGATAGCACTGAAAAACTTCTTC
